# Supplementary material for: A Pooling Genome-Wide Association Study Identifies Susceptibility Loci and Signaling Pathways of Immune Thrombocytopenia in Chinese Han Population
Source: Hindawi journal article supplement (doi:10.1155/2020/7531876), 2020-03-11
Supplement: f1 [file 7531876.f1.pdf]

**Supplementary Table 1.** The FPRP of the top 20 loci in the pooling GWAS of ITP.

| Nearest Gene           | SNP         | Chr | Position    | FPRP      | P-value               | OR   | 95% CI     |
|------------------------|-------------|-----|-------------|-----------|-----------------------|------|------------|
| GBE1/ <b>LINC02027</b> | rs117503120 | 3   | 813,52,557  | 0.012435  | $6.45 \times 10^{-9}$ | 7.24 | 3.53-14.8  |
| <b>TENM4</b>           | rs4483616   | 11  | 78,824,323  | 0.012025  | $8.84 \times 10^{-9}$ | 5.82 | 3.08-11.01 |
| SYN3/TIMP3             | rs5998634   | 22  | 33,169,115  | < 0.00001 | $8.06 \times 10^{-9}$ | 0.35 | 0.25-0.48  |
| RBM45/OSBPL6           | rs16866133  | 2   | 179,022,610 | 0.026704  | $9.39 \times 10^{-8}$ | 0.2  | 0.11-0.36  |
| RGS1/RGS13             | kgp4981410  | 1   | 192,572,631 | 0.00605   | $1.44 \times 10^{-7}$ | 2.27 | 1.7-3.04   |
| DNAH17                 | rs8069561   | 17  | 76,451,921  | 0.058062  | $3.07 \times 10^{-7}$ | 0.27 | 0.17-0.45  |
| LOC100289378/HS1BP3    | rs921598    | 2   | 20,712,253  | 0.032657  | $4.38 \times 10^{-7}$ | 2.51 | 1.78-3.55  |
| SPATA8/LOC91948        | rs4523904   | 15  | 98,047,823  | 0.008292  | $4.98 \times 10^{-7}$ | 0.38 | 0.27-0.54  |
| REEP3                  | rs16918582  | 10  | 65,304,328  | 0.007242  | $6.69 \times 10^{-7}$ | 2.85 | 1.96-4.14  |
| LRP1B                  | kgp7502028  | 2   | 142,417,595 | 0.149265  | $7.39 \times 10^{-7}$ | 2.85 | 1.87-4.31  |
| LOC643496/INTRON       | kgp8967884  | 2   | 168,209,246 | 0.002475  | $8.65 \times 10^{-7}$ | 0.35 | 0.24-0.50  |
| MVP                    | kgp16485512 | 16  | 29,851,738  | 0.169019  | $1.11 \times 10^{-6}$ | 0.43 | 0.31-0.61  |
| CST4/CST1              | rs13044018  | 20  | 23,692,121  | 0.082799  | $1.21 \times 10^{-6}$ | 0.45 | 0.61-0.59  |
| NGR3/LOC728027         | rs17101655  | 10  | 85,050,535  | 0.011547  | $1.22 \times 10^{-6}$ | 2.46 | 1.77-3.41  |
| CRYBB3/CRYBB2          | rs4820621   | 22  | 25,608,548  | 0.158445  | $1.26 \times 10^{-6}$ | 2.38 | 1.68-3.81  |
| LRP1B/INTRON           | rs11898305  | 2   | 142,423,793 | 0.073087  | $1.26 \times 10^{-6}$ | 4.21 | 2.41-7.34  |
| MDC1/TUBB              | rs9295910   | 6   | 30,687,714  | 0.000114  | $1.30 \times 10^{-6}$ | 0.37 | 0.27-0.50  |
| SNTG2/TPO              | rs17091595  | 2   | 1,405,849   | 0.078586  | $1.63 \times 10^{-6}$ | 2.87 | 1.90-4.33  |
| MPHOSPH6/CDH13         | rs4408537   | 16  | 82,408,872  | 0.107083  | $1.88 \times 10^{-6}$ | 0.32 | 0.21-0.50  |
| PTPRD                  | rs10977936  | 9   | 9,734,267   | 0.036741  | $1.98 \times 10^{-6}$ | 4.17 | 2.43-7.15  |

FPRP: false-positive report probabilities; OR: Odds ratio.

**Supplementary Table 2.** Other SNPs in linkage disequilibrium to the rs117503120, rs4483616, rs5998634, and rs16866133.

| uniqID          | rsID        | Chr | Pos      | non_effect_allele | effect_allele | MAF     | gwasP    | r <sup>2</sup> | IndSigSNP   |
|-----------------|-------------|-----|----------|-------------------|---------------|---------|----------|----------------|-------------|
| 3:81352557:A:G  | rs117503120 | 3   | 81352557 | A                 | G             | 0.05357 | 6.45E-09 | 1              | rs117503120 |
| 11:78824323:A:G | rs4483616   | 11  | 78824323 | A                 | G             | 0.04663 | 8.84E-09 | 1              | rs4483616   |
| 11:78823774:C:T | rs12292238  | 11  | 78823774 | T                 | C             | 0.04663 | NA       | 1              | rs4483616   |
| 11:78827407:A:G | rs61882093  | 11  | 78827407 | G                 | A             | 0.04663 | NA       | 1              | rs4483616   |
| 11:78828322:C:T | rs7930419   | 11  | 78828322 | C                 | T             | 0.04663 | NA       | 1              | rs4483616   |
| 11:78834003:C:T | rs948762    | 11  | 78834003 | C                 | T             | 0.04563 | NA       | 0.978595       | rs4483616   |
| 11:78870881:C:T | rs503601    | 11  | 78870881 | C                 | T             | 0.04563 | NA       | 0.604768       | rs4483616   |
| 22:33169115:C:T | rs5998634   | 22  | 33169115 | T                 | C             | 0.07143 | 8.06E-08 | 1              | rs5998634   |
| 22:33168562:A:G | rs5994625   | 22  | 33168562 | G                 | A             | 0.07143 | NA       | 1              | rs5998634   |
| 22:33170101:C:T | rs135150    | 22  | 33170101 | T                 | C             | 0.07143 | NA       | 1              | rs5998634   |
| 22:33170683:C:T | rs130531    | 22  | 33170683 | C                 | T             | 0.07143 | NA       | 1              | rs5998634   |
| 22:33175471:C:G | rs130535    | 22  | 33175471 | G                 | C             | 0.07143 | NA       | 1              | rs5998634   |
| 22:33148102:C:T | rs73156461  | 22  | 33148102 | C                 | T             | 0.04663 | NA       | 0.631038       | rs5998634   |
| 22:33148391:A:G | rs78194905  | 22  | 33148391 | G                 | A             | 0.04663 | NA       | 0.631038       | rs5998634   |
| 22:33155017:A:G | rs1018791   | 22  | 33155017 | G                 | A             | 0.04365 | NA       | 0.620738       | rs5998634   |
| 22:33158361:C:T | rs129303    | 22  | 33158361 | C                 | T             | 0.04464 | NA       | 0.633507       | rs5998634   |
| 22:33162023:A:G | rs129305    | 22  | 33162023 | G                 | A             | 0.04464 | NA       | 0.633507       | rs5998634   |
| 22:33162672:C:T | rs130526    | 22  | 33162672 | C                 | T             | 0.04464 | NA       | 0.633507       | rs5998634   |
| 22:33163549:A:G | rs130527    | 22  | 33163549 | A                 | G             | 0.04464 | NA       | 0.633507       | rs5998634   |
| 22:33165252:C:T | rs130528    | 22  | 33165252 | T                 | C             | 0.04464 | NA       | 0.633507       | rs5998634   |
| 22:33165464:A:C | rs130529    | 22  | 33165464 | C                 | A             | 0.04464 | NA       | 0.633507       | rs5998634   |
| 22:33173055:C:G | rs135151    | 22  | 33173055 | C                 | G             | 0.04464 | NA       | 0.633507       | rs5998634   |

|                 |             |   |           |   |   |         |          |          |            |
|-----------------|-------------|---|-----------|---|---|---------|----------|----------|------------|
| 2:179022610:G:T | rs16866133  | 2 | 179022610 | G | T | 0.02083 | 9.39E-08 | 1        | rs16866133 |
| 2:179021928:A:G | rs7569572   | 2 | 179021928 | A | G | 0.02083 | NA       | 1        | rs16866133 |
| 2:179022730:G:T | rs62176040  | 2 | 179022730 | T | G | 0.01984 | NA       | 0.950413 | rs16866133 |
| 2:179031809:A:C | rs16866146  | 2 | 179031809 | C | A | 0.01885 | NA       | 0.901031 | rs16866133 |
| 2:179047132:A:G | rs62177185  | 2 | 179047132 | A | G | 0.01885 | NA       | 0.901031 | rs16866133 |
| 2:179051111:G:T | rs192290900 | 2 | 179051111 | G | T | 0.01389 | NA       | 0.657143 | rs16866133 |
| 2:179054976:C:T | rs62177188  | 2 | 179054976 | T | C | 0.01687 | NA       | 0.707337 | rs16866133 |
| 2:179061637:A:G | rs60829693  | 2 | 179061637 | A | G | 0.01687 | NA       | 0.707337 | rs16866133 |
| 2:179063979:C:T | rs62177210  | 2 | 179063979 | C | T | 0.01687 | NA       | 0.707337 | rs16866133 |

uniqID: Unique ID of SNPs consisting of chr:position:allele1:allele2 where alleles are alphabetically ordered.

rsID: rsID of the lead SNPs;

Chr: chromosome;

Pos: genomic position (hg19);

MAF: Micro Allele Frequency

gwasP: the P-value of GWAS

IndSigSNP: rsID of independent significant SNPs which are in LD with the lead SNP at  $r^2$  0.1.

**Supplementary Table 3.** Hardy-Weinberg equilibrium analysis of the genotype frequencies of rs117503120, rs5998634, and rs16866133.

| SNP         | Genotypes | Cases    |          | $\chi^2$ | <i>P</i> | Controls |          | $\chi^2$ | <i>P</i> |
|-------------|-----------|----------|----------|----------|----------|----------|----------|----------|----------|
|             |           | Observed | Expected |          |          | Observed | Expected |          |          |
| rs117503120 | GG        | 235      | 235.2    | 0.24     | 0.62     | 215      | 216.2    | 1.42     | 0.23     |
|             | AG        | 15       | 14.6     |          |          | 35       | 32.6     |          |          |
|             | AA        | 0        | 0.2      |          |          | 0        | 1.2      |          |          |
| rs5998634   | CC        | 212      | 211.6    | 0.12     | 0.73     | 238      | 238.1    | 0.15     | 0.70     |
|             | CT        | 36       | 36.8     |          |          | 12       | 11.7     |          |          |
|             | TT        | 2        | 1.6      |          |          | 0        | 0.1      |          |          |
| rs16866133  | TT        | 247      | 247.0    | 0.009    | 0.92     | 235      | 235.2    | 0.24     | 0.62     |
|             | GT        | 3        | 3.0      |          |          | 15       | 14.6     |          |          |
|             | GG        | 0        | 0.0      |          |          | 0        | 0.2      |          |          |

The  $P > 0.05$  was considered to be consistent with the Hardy-Weinberg equilibrium.

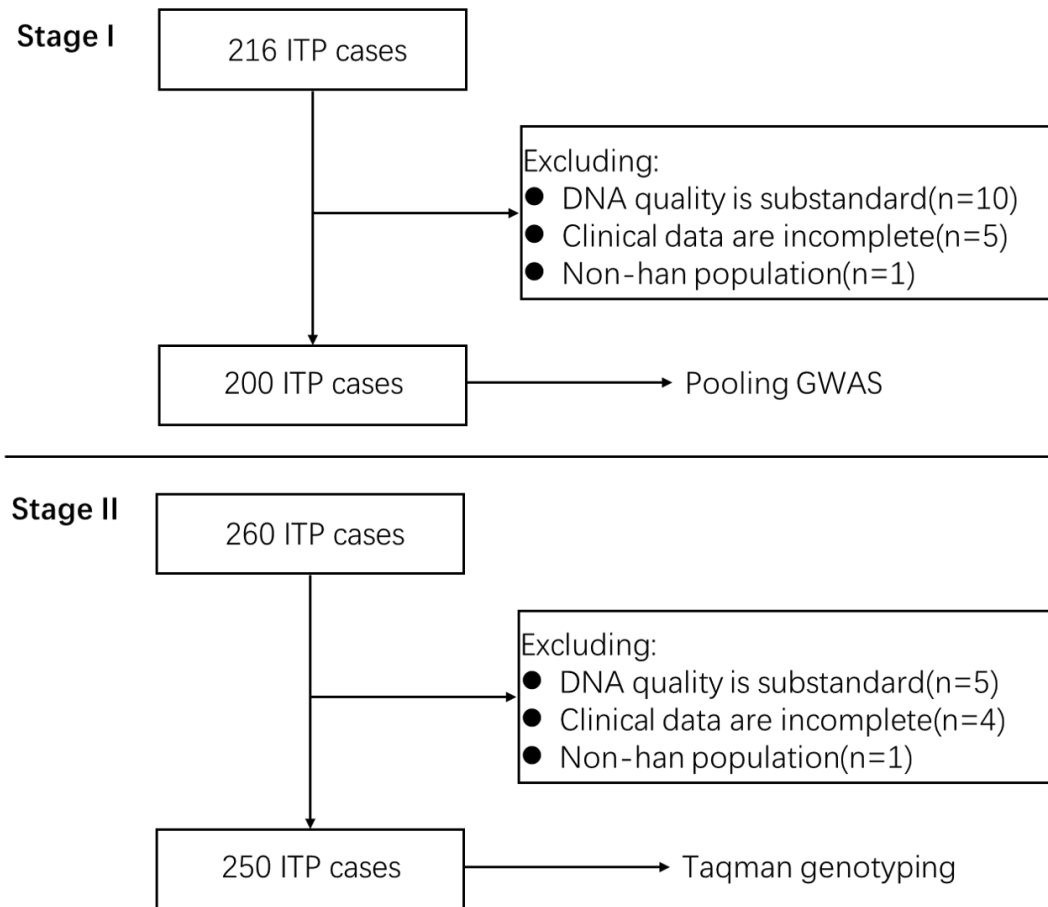

**Supplementary Figure 1: The flowchart of two stage sample collection.**

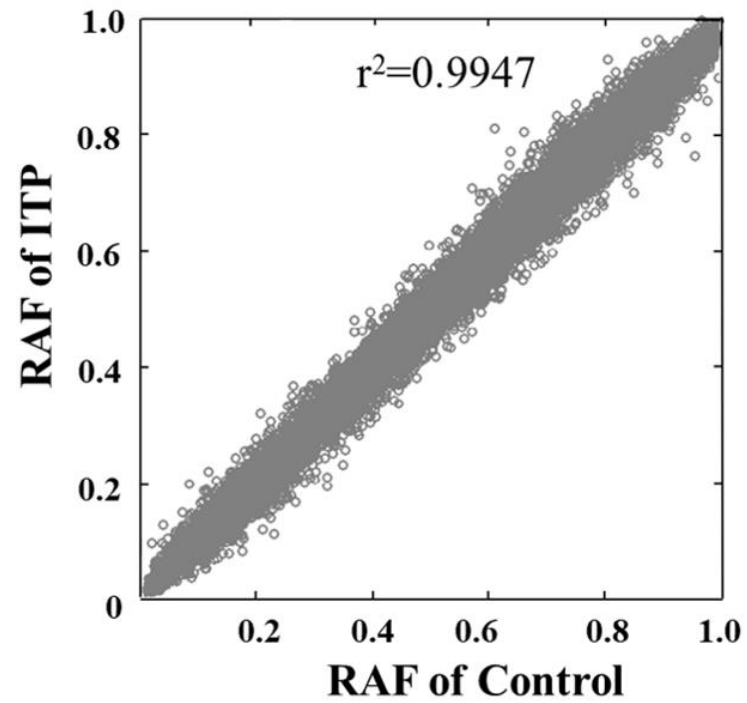

**Supplementary Figure 2:** Scatter plot of pooling genotypic data. Predicted allele frequencies of 862,620 randomly selected SNPs in ITP case and control DNA pools,  $r^2 = 0.9947$ . Abbreviations: ITP: Immune thrombocytopenia; SNPs, single-nucleotide polymorphisms.

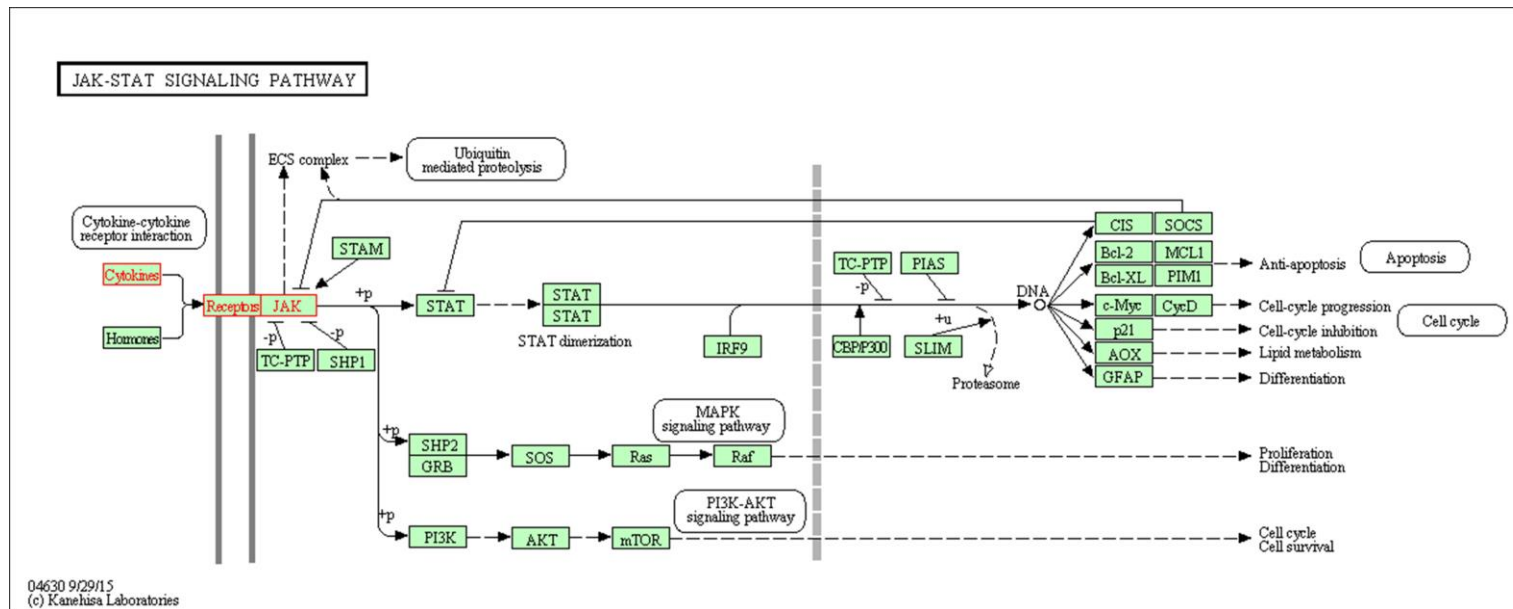

### Supplementary Figure 3.

KEGG pathway for the JAK-STAT signaling pathway. The significant genes (*JAK2*, *IL12A*, *TPO*, *SPRY2*, *CBLB*, and *CSF3R*) in our GWAS are shown in red.

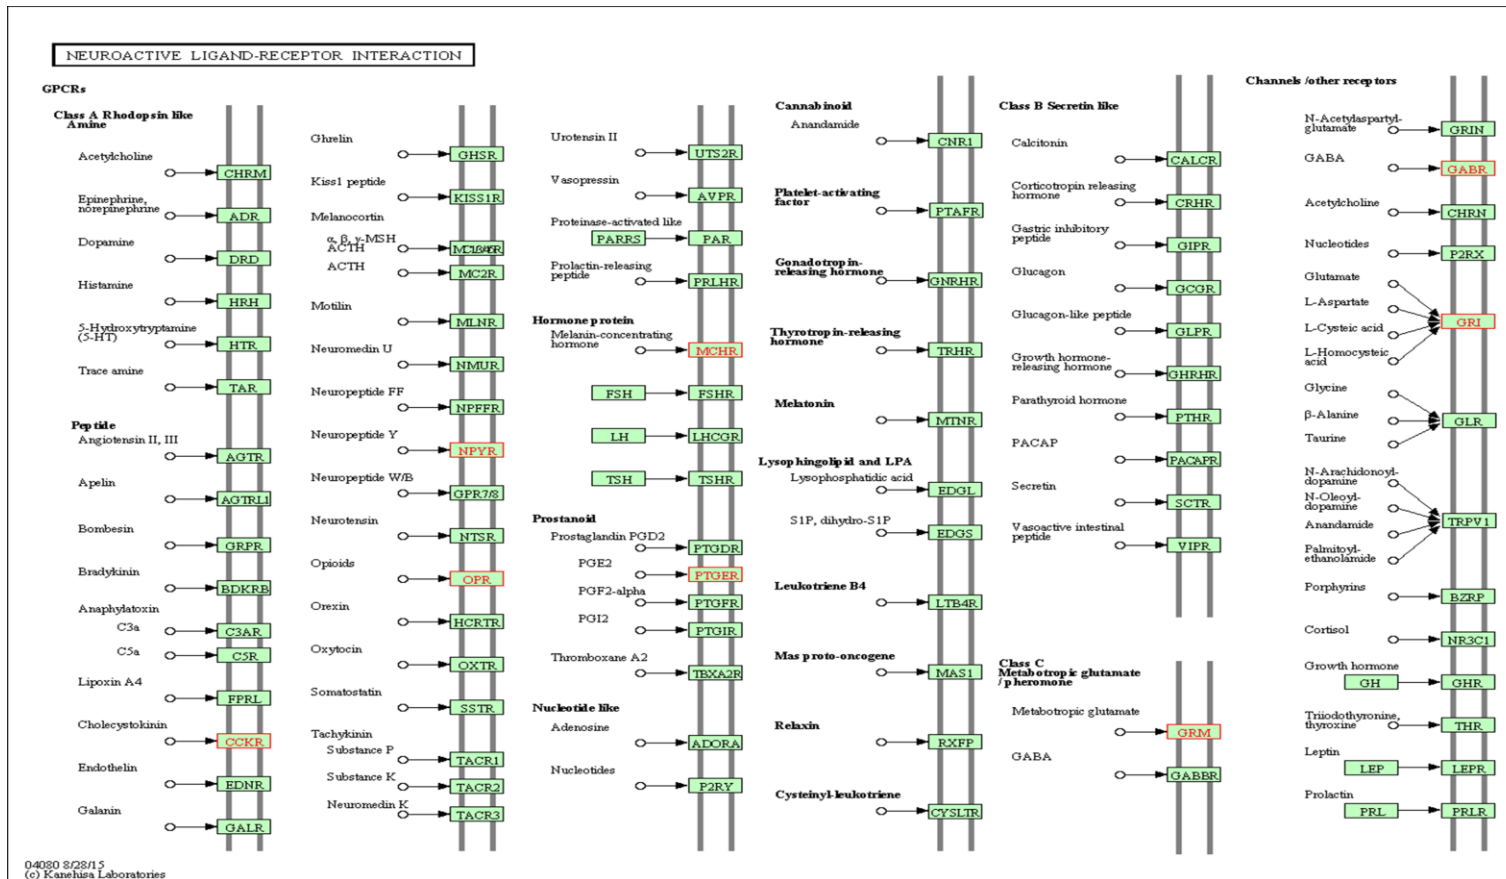

**Supplementary Figure 4.**

KEGG pathway for the Neuroactive ligand-receptor interaction signaling pathway. The significant genes (PTGER3, NPY2R, MCHR2, GRIK3, GABRG2, OPRM1, CCKAR, GRM8, and CSF3R) in our GWAS are shown in red.



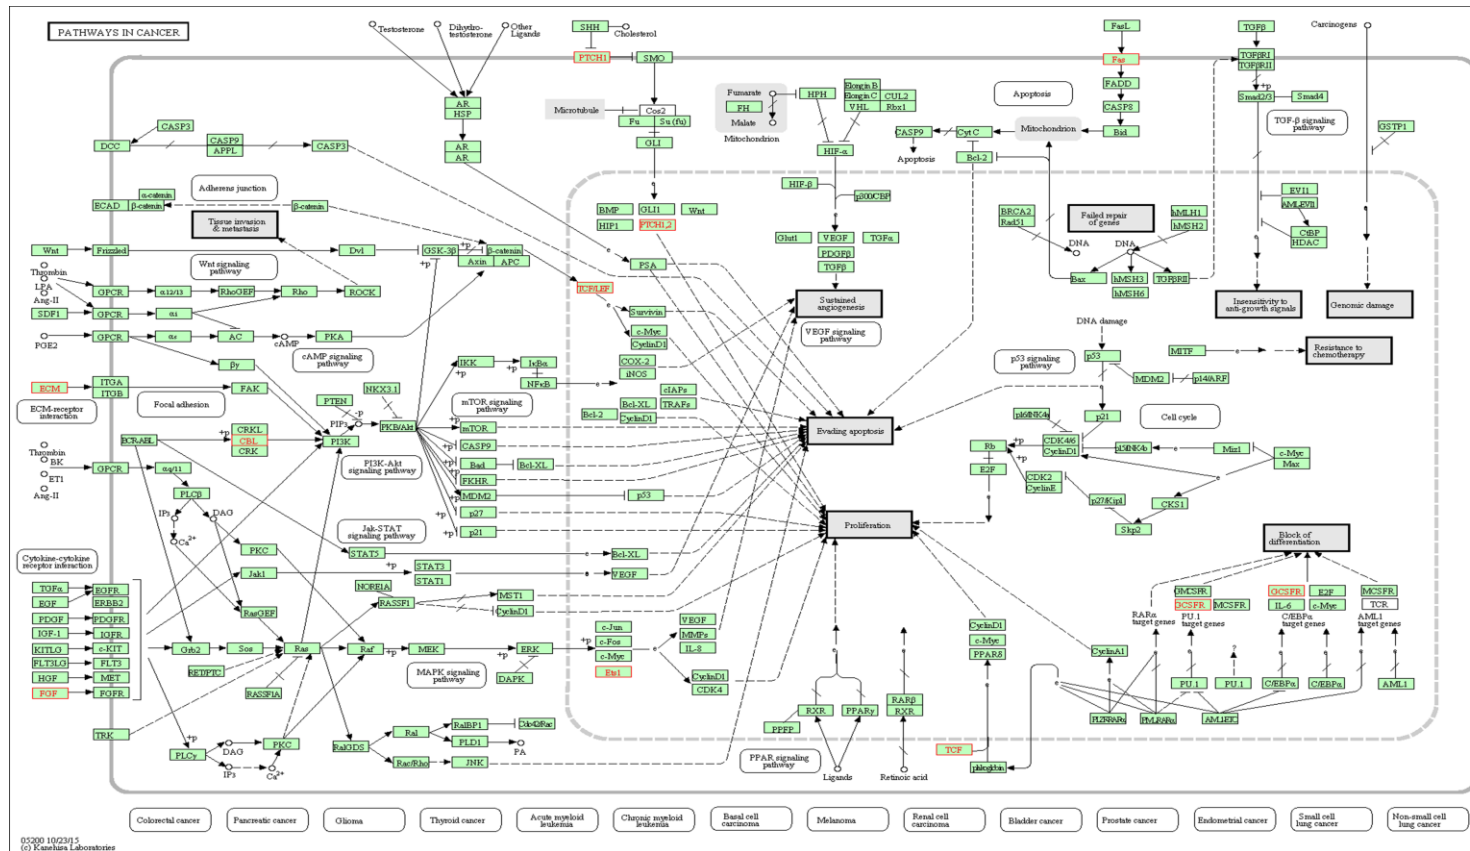

**Supplementary Figure 5.**

KEGG pathway for the Pathway in cancer pathway. The significant genes (*FGF9*, *COL4A2*, *CBLB*, *PTCH1*, *ETS1*, *TCF7L2*, *CSF3R*, and *FAS*) in our GWAS are shown in red.
